# Supplementary material for: Highly monodisperse Pt(0)@AC NPs as highly efficient and reusable catalysts: the effect of the surfactant on their catalytic activities in room temperature dehydrocoupling of DMAB
Source: Royal Society of Chemistry journal article supplement (doi:10.1039/c5cy01371b), 2015-10-13
Supplement: c5cy01371b1.pdf [file c5cy01371b1.pdf]

### Supplementary Information for

#### Highly Monodisperse Pt(0)/AC NPs as Highly Efficient and Reusable Catalysts: The Effect of the Surfactant on their Catalytic Activities in Room Temperature Dehydrocoupling of DMAB

Betül Çelik †, Esmâ Erken †, Sinan Eriş, Yunus Yıldız, Birgütay Şahin, Handan Pamuk, Fatih Sen\*

Sen Research Group, Biochemistry Department, Faculty of Arts and Science,  
Dumlupınar University, Evliya Çelebi Campus 43100 Kütahya, Turkey.

Corresponding author: [fatih.sen@dpu.edu.tr](mailto:fatih.sen@dpu.edu.tr)

Tel:90 274 265 20 31 -37 02 Fax: 90 274 265 20 56

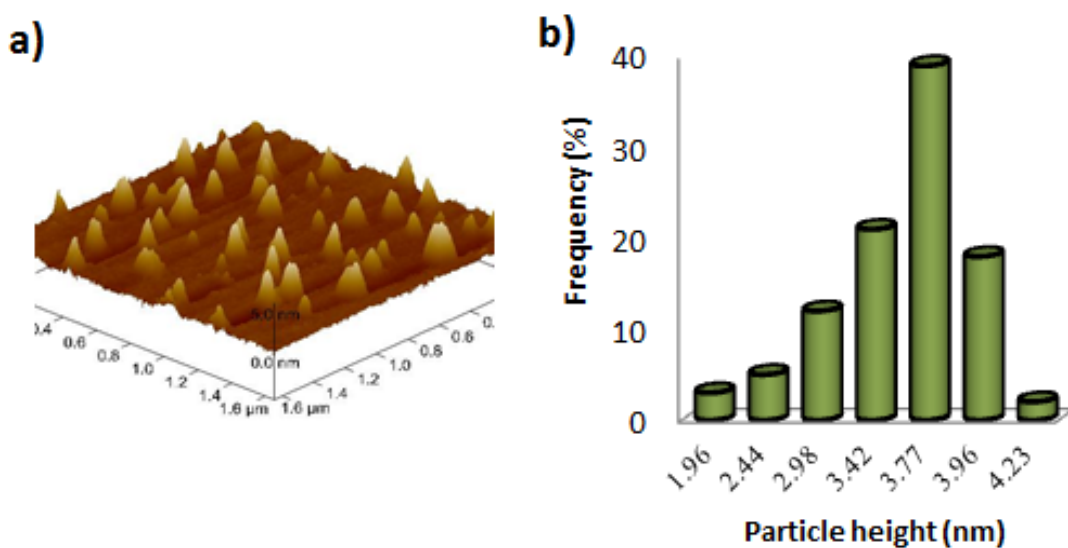

**Fig. S1.** AFM image of Pt(0)/DPA@AC (a) and histogram of height of particles obtained from AFM data (b).

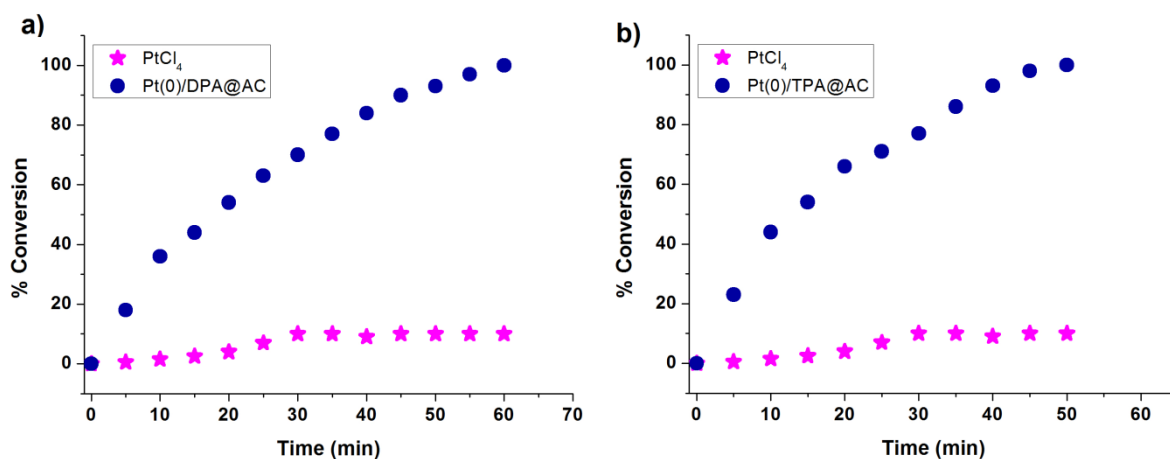

**Fig. S2.** Plots % conversion versus time graph for the catalytic dehydrocoupling of DMAB in THF at room temperature starting with 7.5 % mol of a) Pt(0)/DPA@AC and PtCl<sub>4</sub> b) Pt(0)/TPA@AC and PtCl<sub>4</sub>

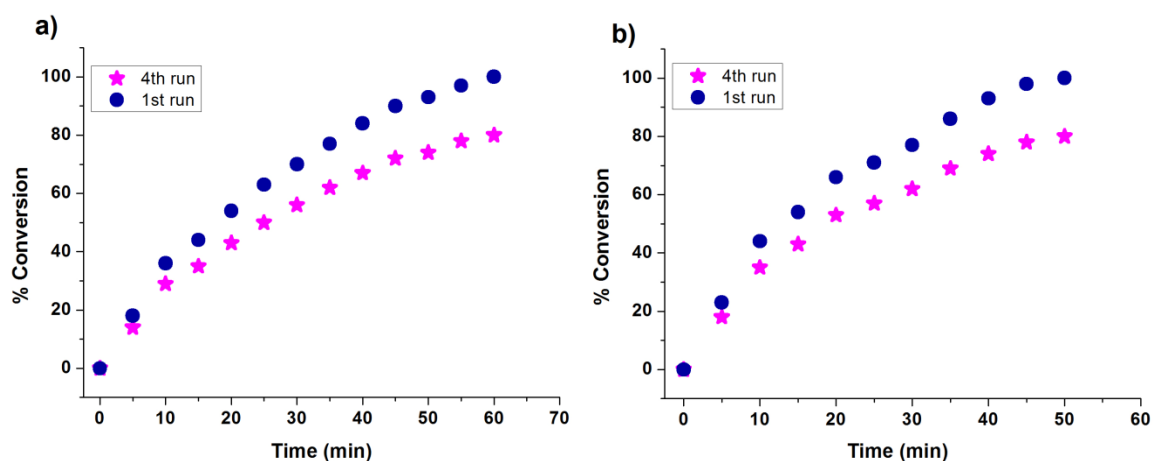

**Fig. S3.** Plots % conversion versus time graph for Pt(0)/DPA@AC (a) and Pt(0)/TPA@AC (b) (7.5 % mol) catalysed dehydrocoupling of DMAB in THF at room temperature for 1<sup>st</sup> and 4<sup>th</sup> catalytic runs.
